# Supplementary material for: Amorphous BN-Based Synaptic Device with High Performance in Neuromorphic Computing
Source: MDPI journal article supplement (doi:10.3390/ma16206698), 2023-10-15
Supplement: s1 [file s1]

Supplementary Materials

# Amorphous BN-Based Synaptic Device with High Performance in Neuromorphic Computing

Juyeong Pyo <sup>1,†</sup>, Junwon Jang <sup>1,†</sup>, Dongyeol Ju <sup>1</sup>, Subaek Lee <sup>1</sup>, Wonbo Shim <sup>2,\*</sup> and Sungjun Kim <sup>1,\*</sup>

<sup>1</sup> Division of Electronics and Electrical Engineering, Dongguk University, Seoul 04620, Korea; joozero0908@gmail.com (J.P.); thdn159@gmail.com (J.J.); judongyeol0117@gmail.com (D.J.); leesb981228@gmail.com (S.L.)

<sup>2</sup> Department of Electrical and Information Engineering, Seoul National University of Science and Technology, Seoul 01811, Korea

\* Correspondence: wbshim@seoultech.ac.kr (W.S.); sungjun@dongguk.edu (S.K.)

† These authors contributed equally to this work.

**Citation:** Pyo, J.; Jang, J.; Ju, D.;

Lee, S.; Shim, W.; Kim, S.

Amorphous BN-Based Synaptic Device with High Performance in Neuromorphic Computing. *Materials* **2023**, *16*, x.

<https://doi.org/10.3390/xxxxx>

Academic Editor(s): Stephan Menzel

Received: 13 September 2023

Revised: 13 October 2023

Accepted: 14 October 2023

Published: date

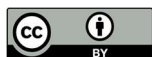

**Copyright:** © 2023 by the authors.

Submitted for possible open access publication under the terms and conditions of the Creative Commons Attribution (CC BY) license (<https://creativecommons.org/licenses/by/4.0/>).

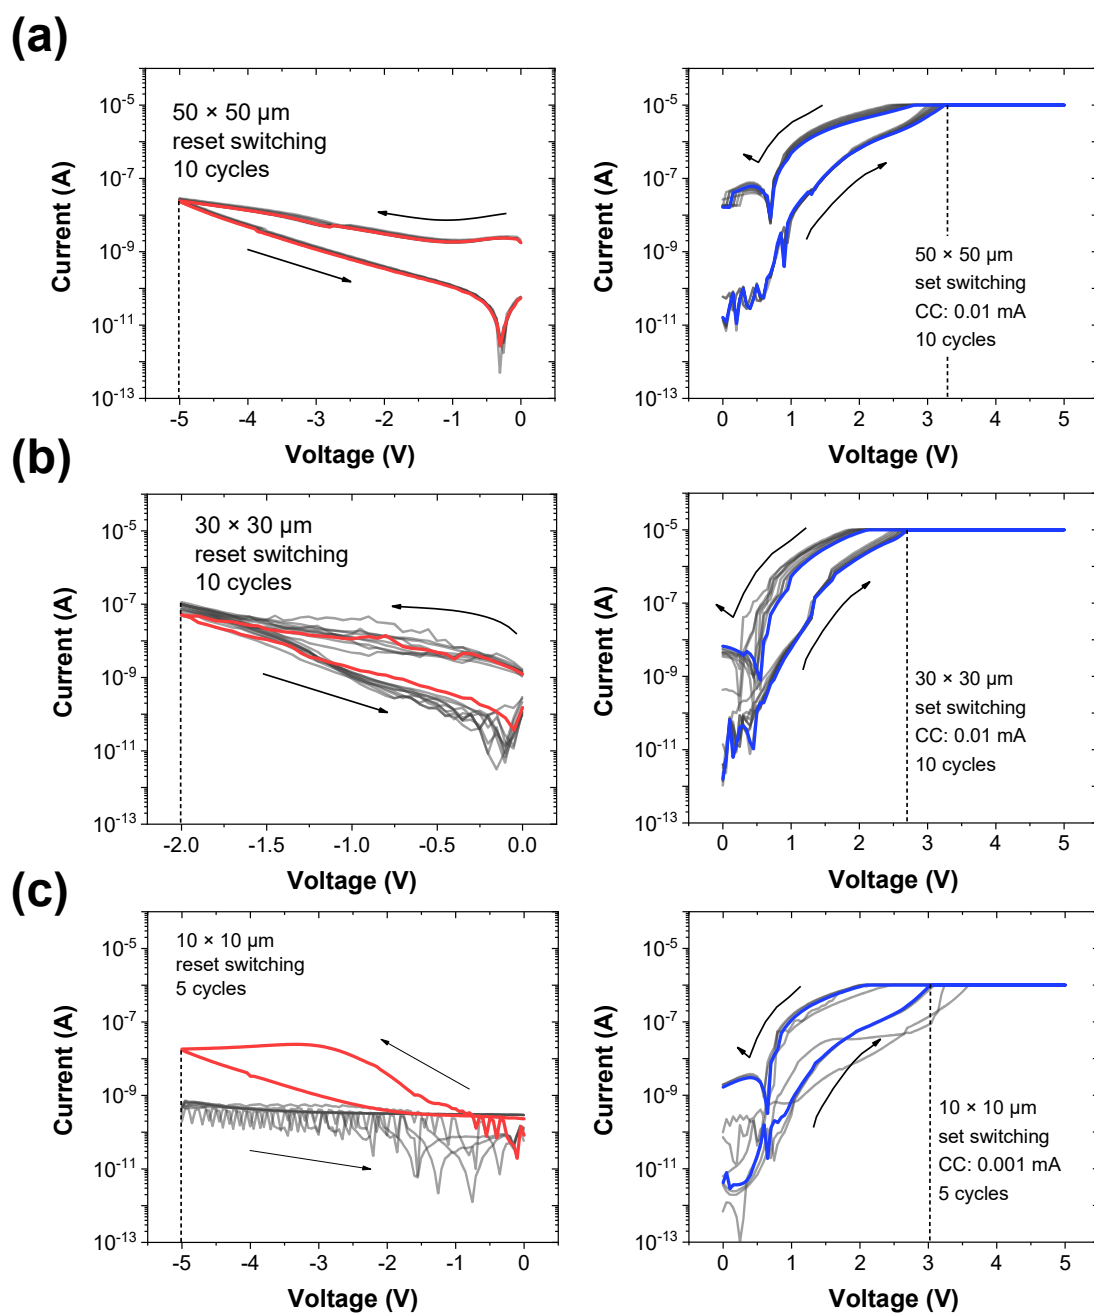

**Figure S1.** I-V curve according to (a)  $50 \times 50 \mu\text{m}^2$ , (b)  $30 \times 30 \mu\text{m}^2$  and (c)  $10 \times 10 \mu\text{m}^2$ , respectively.

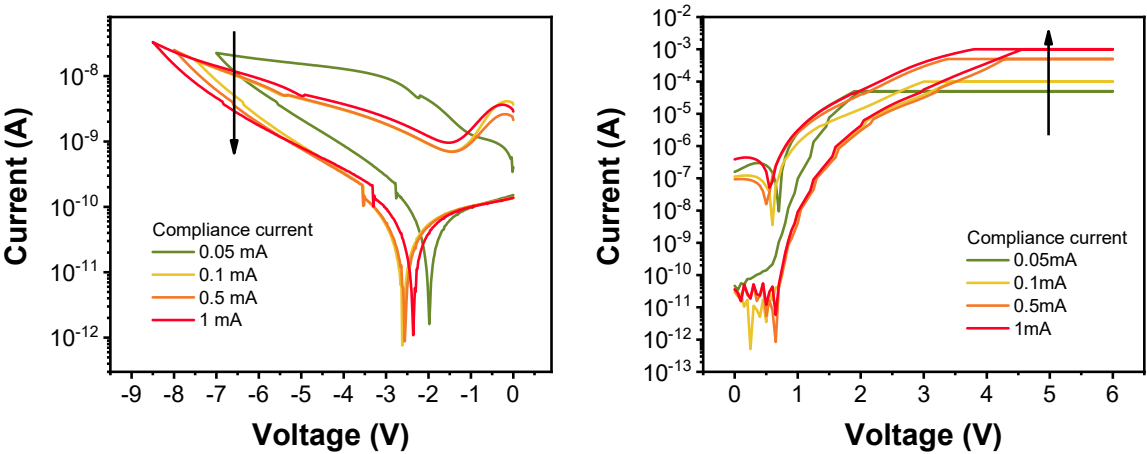

**Figure S2.** Different compliance currents and reset voltages were used to achieve a multilevel state.

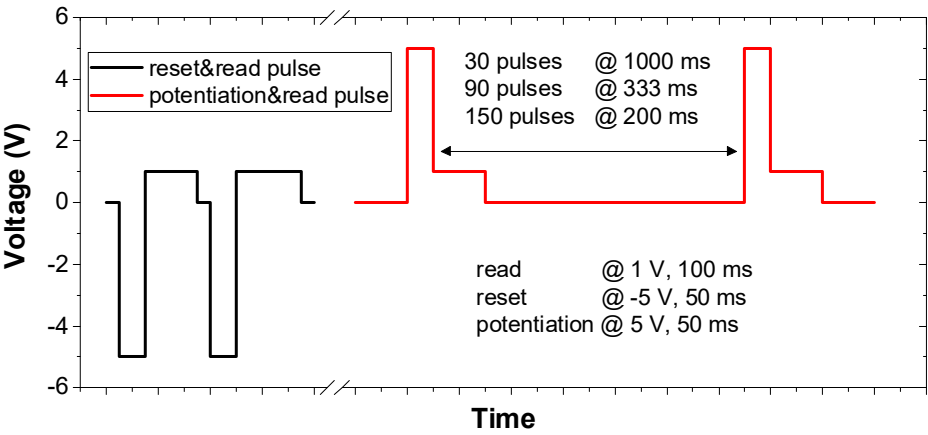

**Figure S3.** Pulse scheme for voltage and time interval variations.

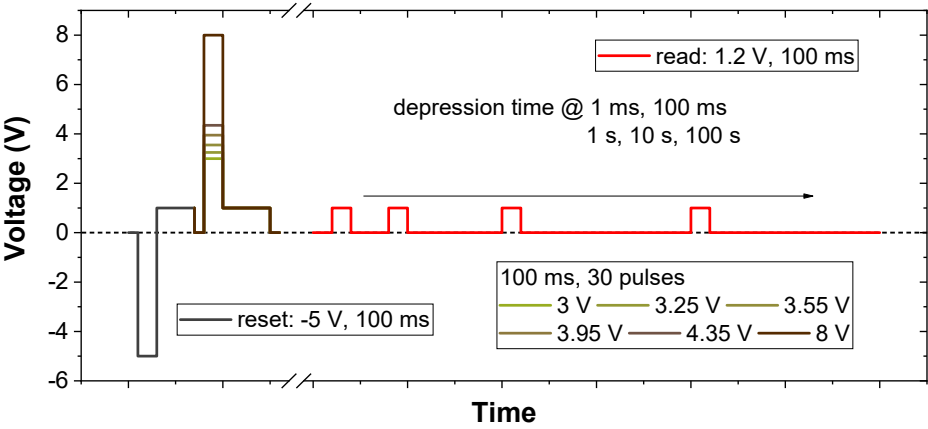

Figure S4. Pulse scheme for initialization voltage and depression interval time.

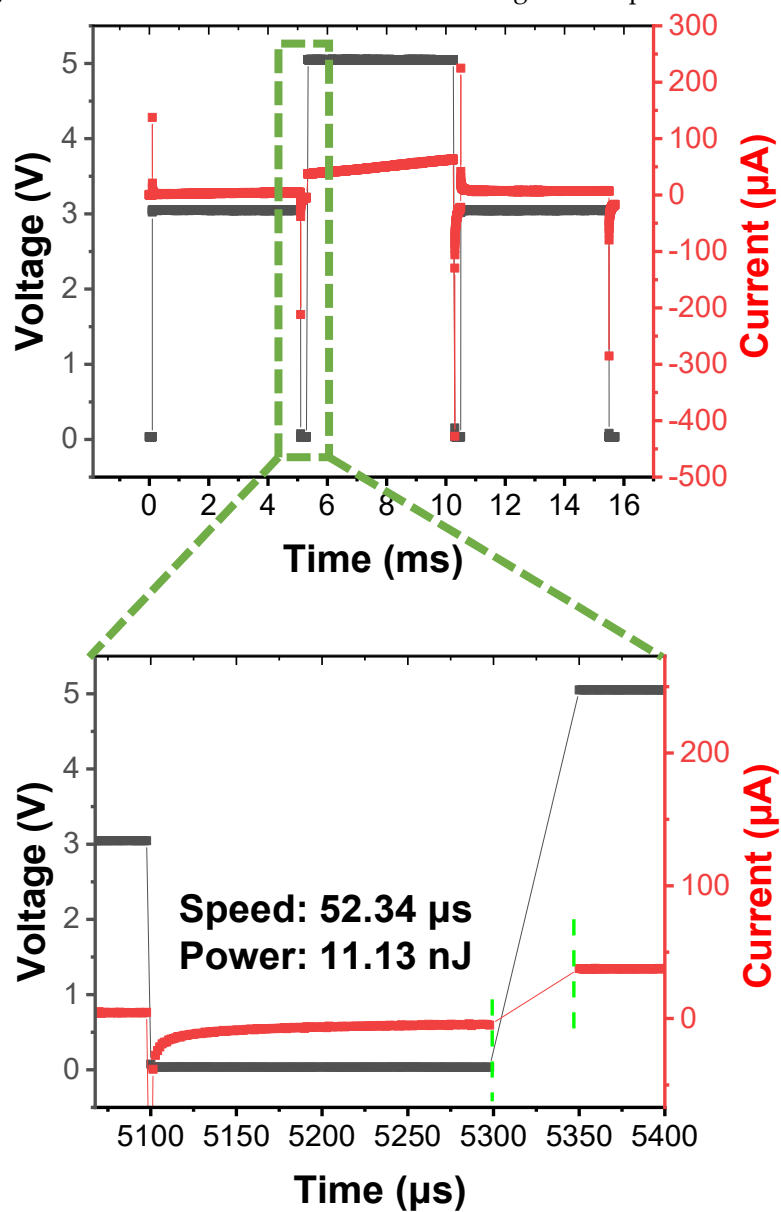

Figure S5. The switching speed of the SET pulse for Pt/BN/TiN devices is illustrated in the graph. The black lines represent the applied voltage, while the red lines depict the current response pulses.
